# Supplementary material for: Acyl-CoA dehydrogenase substrate promiscuity limits the potential for development of substrate reduction therapy in disorders of valine and isoleucine metabolism
Source: bioRxiv or medRxiv preprint supplement (doi:10.1101/2022.11.22.517273), 2022-11-22

## **Supplemental Information**

### **Acyl-CoA dehydrogenase substrate promiscuity limits the potential for development of substrate reduction therapy in disorders of valine and isoleucine metabolism**

Sander M. Houten<sup>1\*</sup>, Tetyana Dodatko<sup>1</sup>, William Dwyer<sup>1</sup>, Hongjie Chen<sup>1,2</sup>, Brandon Stauffer<sup>1,2</sup>, Robert J. DeVita<sup>3,4</sup>, Frédéric M. Vaz<sup>5,6,7</sup>, Chunli Yu<sup>1,2</sup>, João Leandro<sup>1</sup>

<sup>1</sup>Department of Genetics and Genomic Sciences, Icahn School of Medicine at Mount Sinai, New York, NY 10029, USA

<sup>2</sup>Mount Sinai Genomics, Inc, Stamford, CT 06902, USA

<sup>3</sup>Department of Pharmacological Sciences, Icahn School of Medicine at Mount Sinai, New York, NY 10029, USA

<sup>4</sup>Drug Discovery Institute, Icahn School of Medicine at Mount Sinai, New York, NY 10029, USA

<sup>5</sup>Amsterdam UMC location University of Amsterdam, Department of Clinical Chemistry and Pediatrics, Laboratory Genetic Metabolic Diseases, Emma Children's Hospital, Meibergdreef 9, Amsterdam, The Netherlands

<sup>6</sup>Amsterdam Gastroenterology Endocrinology Metabolism, Inborn errors of metabolism, Amsterdam, The Netherlands

<sup>7</sup>Core Facility Metabolomics, Amsterdam UMC location University of Amsterdam, Amsterdam, The Netherlands

\*For correspondence: Sander Houten, Department of Genetics and Genomic Sciences, Icahn School of Medicine at Mount Sinai, 1425 Madison Avenue, Box 1498, New York, NY 10029, Tel: 212-659-9222, E-mail: sander.houten@mssm.edu

## Supplemental Figures

**Figure S1. The degradation pathway of branched-chain amino acids (BCAAs) and propionyl-CoA metabolism.** BCAAs undergo an initial reversible transamination step by the branched-chain aminotransferase isozymes BCAT1 (cytosolic) or BCAT2 (mitochondrial) to produce the corresponding 2-oxo acid analogs. The second enzymatic step proceeds via an irreversible oxidative decarboxylation and coupled thioesterification of the respective 2-oxo acids by the branched-chain 2-oxo acid dehydrogenase complex (BCKDHc). The BCKDHc is a multisubunit enzymatic complex comprising several copies of an E1 component, a heterotetramer of BCKDHA and BCKDHB, a thiamine diphosphate-dependent decarboxylase; an E2 component DBT, a lipoate-dependent transacylase, and an E3 component DLD, a dehydrogenase that is shared with the other 2-oxo acid dehydrogenase complexes; the pyruvate, 2-oxoglutarate and 2-oxoadipate dehydrogenase complexes. The BCKDHc kinase (BCKDK) phosphorylates serine 293 of the E1 $\alpha$  subunit, which inactivates the BCKDHc. The BCKDHc is dephosphorylated by the mitochondrial protein phosphatase PPM1K. The three BCAAs share the BCAT and BCKDH steps, after which unique enzymes participate in the catabolism of each BCAA, with the exception of the hydratase step in valine and isoleucine metabolism catalyzed by crotonase (ECHS1). Valine is a gluconeogenic amino acid, producing succinyl-CoA, whereas leucine is ketogenic, producing acetoacetic acid and acetyl-CoA. Isoleucine is both ketogenic and gluconeogenic with the formation of acetyl-CoA and succinyl-CoA. In patients with mutations in the *PCCA* or *PCCB* gene, propionyl-CoA carboxylase (PCC) is deficient leading to accumulation of propionyl-CoA and its toxic derivatives (2-methylcitric acid, propionic acid, 3-OH-propionic acid, propionylglycine and propionyl-carnitine) causing propionic acidemia. Threonine and methionine catabolism, the oxidation of branched-chain and odd-chain fatty acids, and cholesterol side-chain metabolism also contribute to the pool of propionyl-CoA. The abbreviations used are: ACAD8, isobutyryl-CoA dehydrogenase (also known as acyl-CoA dehydrogenase family member 8); SBCAD, short/branched-chain acyl-CoA dehydrogenase (also 2-methylbutyryl-CoA dehydrogenase); ACAT1, acetyl-CoA acetyltransferase 1; AdoCbl, adenosylcobalamin; ALDH6A1, methylmalonate semialdehyde dehydrogenase; AUH, 3-methylglutaconyl-CoA hydratase; BCAT, branched-chain aminotransferase; BCKDH, branched-chain 2-oxo acid dehydrogenase; DBT, dihydrolipoamide branched-chain transacylase; DLD, dihydrolipoyl dehydrogenase; ECHS1, mitochondrial short-chain enoyl-CoA hydratase 1; HIBADH, 3-hydroxyisobutyric acid dehydrogenase; HIBCH, 3-hydroxyisobutyryl-CoA hydrolase; HMGCL, 3-hydroxy-3-methylglutaryl CoA lyase; HSD17B10,

2-methyl-3-hydroxybutyryl-CoA dehydrogenase (also known as 3-hydroxyacyl-CoA dehydrogenase type-2); IVD, isovaleryl-CoA dehydrogenase; MCCC1/2, methylcrotonyl-CoA carboxylase subunit  $\alpha/\beta$ ; MCEE, methylmalonyl-CoA epimerase; MUT, methylmalonyl-CoA mutase; PCCA/B, propionyl-CoA carboxylase subunit  $\alpha/\beta$ .

**Figure S2. A HEK-293 cell line model for PA.** (A) Immunoblot validation of *PCCB* KO cell lines. *PCCB* KO cell lines were generated in wild type HEK-293 cells using guides targeting exon 5 (*upper panel*) or exon 7 (*lower panel*). Individual *PCCB* KO clones are indicated as P#. Citrate synthase (CS) was used as loading control and the position of molecular mass marker proteins (in kDa) is given. Selected clones are indicated in bold. (B) Production of C3-carnitine in the extracellular medium of selected *PCCB* KO cell lines ( $\Delta$ ) and wild-type HEK-293 cells ( $\bullet$ ). Error bars indicate SD.

**Figure S3. Characterization of *ECHS1* KO cell lines.** (A) *ECHS1* was targeted using CRISPR-Cas9 genome editing with guides in exon 2 and exon 3. For each guide, 10 clonal cell lines were characterized using immunoblotting. Wild-type HEK-293 cells served as control. For both guides, 8 out of 10 clones showed a complete loss of *ECHS1* protein. The same blots were probed with an antibody against lipoic acid, and E2p (DLAT) and E2o (DLST) were identified based on their molecular weight. Citrate synthase (CS) was used as loading control and the position of the molecular weight marker proteins is indicated. (B) Quantification of E2p and E2o normalized to CS. (C) Activity of the 2-oxoglutarate dehydrogenase complex in wild-type HEK-293 and five selected *ECHS1* KO cell lines. Error bars indicate SD. \*\*\*\*,  $P < 0.0001$ .

**Figure S4. Acylcarnitine levels in HEK-293 cells after incubation with 0-100  $\mu$ M MCPA (Related to Figure 1).** (A) Production of acylcarnitines in the extracellular medium of HEK-293 cells after incubation with 0-100  $\mu$ M MCPA. (B) Quantification of C4- and C5-carnitine isomer levels upon inhibition of HEK-293 cells with MCPA. The fifth C5-carnitine isomer, pivaloyl-carnitine was below the level of detection. Error bars indicate SD.

**Figure S5. Validation of *ACADSB* KO cell lines (Related to Figure 2A).** (A) *ACADSB* KO cell lines were generated in wild type HEK-293 cells, using a guide targeting exon 6 5' strand (*upper panel*) or 3' strand (*lower panel*). *ACADSB* KO clones are indicated as A#. Citrate synthase (CS) was used as loading control and the position of molecular mass marker proteins (in kDa) is given. Selected clones are indicated in bold. (B) Statistical analyses of C3-carnitine and C5-

carnitine extracellular levels in wild type (●) and *ACADSB* KO (△) HEK-293 cell lines. There is a 4.2-fold reduction in C3-carnitine levels and a 9.3-fold increase in C5-carnitine levels in *ACADSB* KO cell lines compared with wild type cells. Error bars indicate SD. \*\*\*\*,  $P < 0.0001$ . (C) Production of acylcarnitines in the extracellular medium of wild type and selected *ACADSB* KO HEK-293 cell lines.

**Figure S6. Acylcarnitine levels in wild-type and *PCCB* KO HEK-293 cell lines after incubation with MCPA (Related to Figure 2B).** Production of acylcarnitines in the extracellular medium of wild-type and selected *PCCB* KO HEK-293 cell lines after incubation with increasing concentrations of MCPA. Error bars indicate SD.

**Figure S7. Validation of *ACAD8* KO cell lines (Related to Figure 3).** (A) Acylcarnitine levels in wild-type, *ECHS1*, *ACAD8* and *ECHS1/ACAD8* KO HEK-293 cell lines. Four independently generated clones were tested for the *ACAD8* and *ECHS1/ACAD8* KO HEK-293 cell lines. (B) Acylcarnitine levels in wild-type, *ECHS1*, *ACAD8* and *ECHS1/ACAD8* KO HEK-293 cell lines upon treatment with MCPA or vehicle (DMSO). Cell lines were treated with 25 $\mu$ M MCPA for 72 hours as indicated. The values for the *ACAD8* and *ECHS1/ACAD8* KO HEK-293 cell lines were the average of 4 different clones.

**Figure S8. Validation of *ECHS1/ACAD8/ACADSB* KO cell lines (Related to Figure 4).** (A) Acylcarnitine levels in wild-type, *ECHS1*, *ECHS1/ACAD8*, *ACAD8/ACADSB*, *ECHS1/ACADSB*, *ECHS1/ACAD8/ACADSB* KO HEK-293 cell lines. (B) Acylcarnitine levels in wild-type, *ECHS1*, *ECHS1/ACAD8*, *ECHS1/ACAD8/ACADSB* KO HEK-293 cell lines upon treatment with MCPA or vehicle (DMSO). Cell lines were treated with 25 $\mu$ M MCPA for 72 hours as indicated. The values for the *ECHS1/ACAD8/ACADSB* KO HEK-293 cell lines were the average of 3 different clones. Duplicate measures are plotted for wild-type HEK-293 and a single clone of the *ECHS1* and *ECHS1/ACAD8* cell lines.

**Figure S9. *ECHS1/ACAD8/ACADSB/ACADM* KO cell lines (Related to Figure 5).** (A) Immunoblot validation of *ACADM* KO cell lines obtained using a guide targeting exon 5. The position of the molecular weight marker proteins is indicated. Similar results were obtained for a guide targeting exon 7. Lipoylation was studied in clones obtained using guides targeting exon 5 and 7. (B) Acylcarnitine levels in wild-type, *ECHS1/ACAD8*, *ECHS1/ACAD8/ACADSB*, *ECHS1/ACAD8/ACADM* and *ECHS1/ACAD8/ACADSB/ACADM* KO HEK-293 cell lines upon

treatment with 100  $\mu$ M lauric acid (C12:0) or vehicle (ethanol). Cell lines were treated with 25 $\mu$ M MCPA for 72 hours as indicated. The values for the *ECHS1/ACAD8/ACADM* and *ECHS1/ACAD8/ACADSB/ACADM* KO HEK-293 cell lines were the average of 4 different clones. Duplicate measures are plotted for wild-type HEK-293 and a single clone of the *ECHS1/ACAD8* and *ECHS1/ACAD8/ACADSB* KO cell lines.

## Supplemental tables

**Table S1. Guide sequences used for CRISPR-Cas9 genome editing.**

| <b>Target gene</b> | <b>Exon</b>  | <b>Guide sequence</b>   |
|--------------------|--------------|-------------------------|
| <i>PCCB</i>        | 5 (+ strand) | CATGGACCAGGCCATAACGG    |
| <i>PCCB</i>        | 7 (+ strand) | CAATGAGGATGTTACCCAGG    |
| <i>ECHS1</i>       | 2 (+ strand) | CCTGGTTGAGCTCGTCAATC    |
| <i>ECHS1</i>       | 3 (+ strand) | CCATTGACAGCAGCGATGACTGG |
| <i>ACADSB</i>      | 6 (+ strand) | TTAGTAGATCGTGATACTCC    |
| <i>ACADSB</i>      | 6 (- strand) | ATCACGATCTACTAAGAAGG    |
| <i>ACAD8</i>       | 6 (+ strand) | GTGGTCATGTGCCGAACAGG    |
| <i>ACADM</i>       | 7 (+ strand) | AAGATGTGGATAACCAACGG    |
| <i>ACADM</i>       | 5 (+ strand) | GGGGTTCAGACTGCTATTGA    |

**Table S2. Primers for PCR amplification and Sanger sequencing.**

| Target gene   | Exon (fragment size in bp) | Primer sequence                                                            |
|---------------|----------------------------|----------------------------------------------------------------------------|
| <i>PCCB</i>   | 5 (377bp)                  | Fw: 5'- TCGTGATGGGGAGTGAAAC -3'<br>Rev: 5'- GAACAGACACAATGCGGCAG -3'       |
| <i>PCCB</i>   | 7 (306bp)                  | Fw: 5'- CCTCATTCAGCCACGTCACTA -3'<br>Rev: 5'- TAAAACTGCCACCAGGCTCT -3'     |
| <i>ECHS1</i>  | 2 (311bp)                  | Fw: 5'- CCCTTTTTGCCTTCTTGCTCC -3'<br>Rev: 5'- AGAGGCGCAAATCTGTCTGG -3'     |
| <i>ECHS1</i>  | 3 (274bp)                  | Fw: 5'- CTGGTGTGCTCTGAAGTTCC -3'<br>Rev: 5'- CACGGTTCCTTCAACCACGA -3'      |
| <i>ACADSB</i> | 6 (378bp)                  | Fw: 5'- ATGTTGCAATTCTGAGTCCATTAG -3'<br>Rev: 5'- AATACTCTCCTGCGTGTGCTT -3' |
| <i>ACAD8</i>  | 6 (392bp)                  | Fw: 5'- TCCCAGACGCTGTGAGAACT -3'<br>Rev: 5'- TCCCCAGAGGCCTAGTGTTTA -3'     |
| <i>ACADM</i>  | 7 (398bp)                  | Fw: 5'- ATTGTGTAACAGAACCTGGAGCA -3'<br>Rev: 5'- ACAGAGTGCTAGCCTTCCTA -3'   |
| <i>ACADM</i>  | 5 (466bp)                  | Fw: 5'- TTCTTATTGTGCCAGCCAGAAC -3'<br>Rev: 5'- GGCCAGAGTTATCAAGCCTCG -3'   |

**Figure S1**

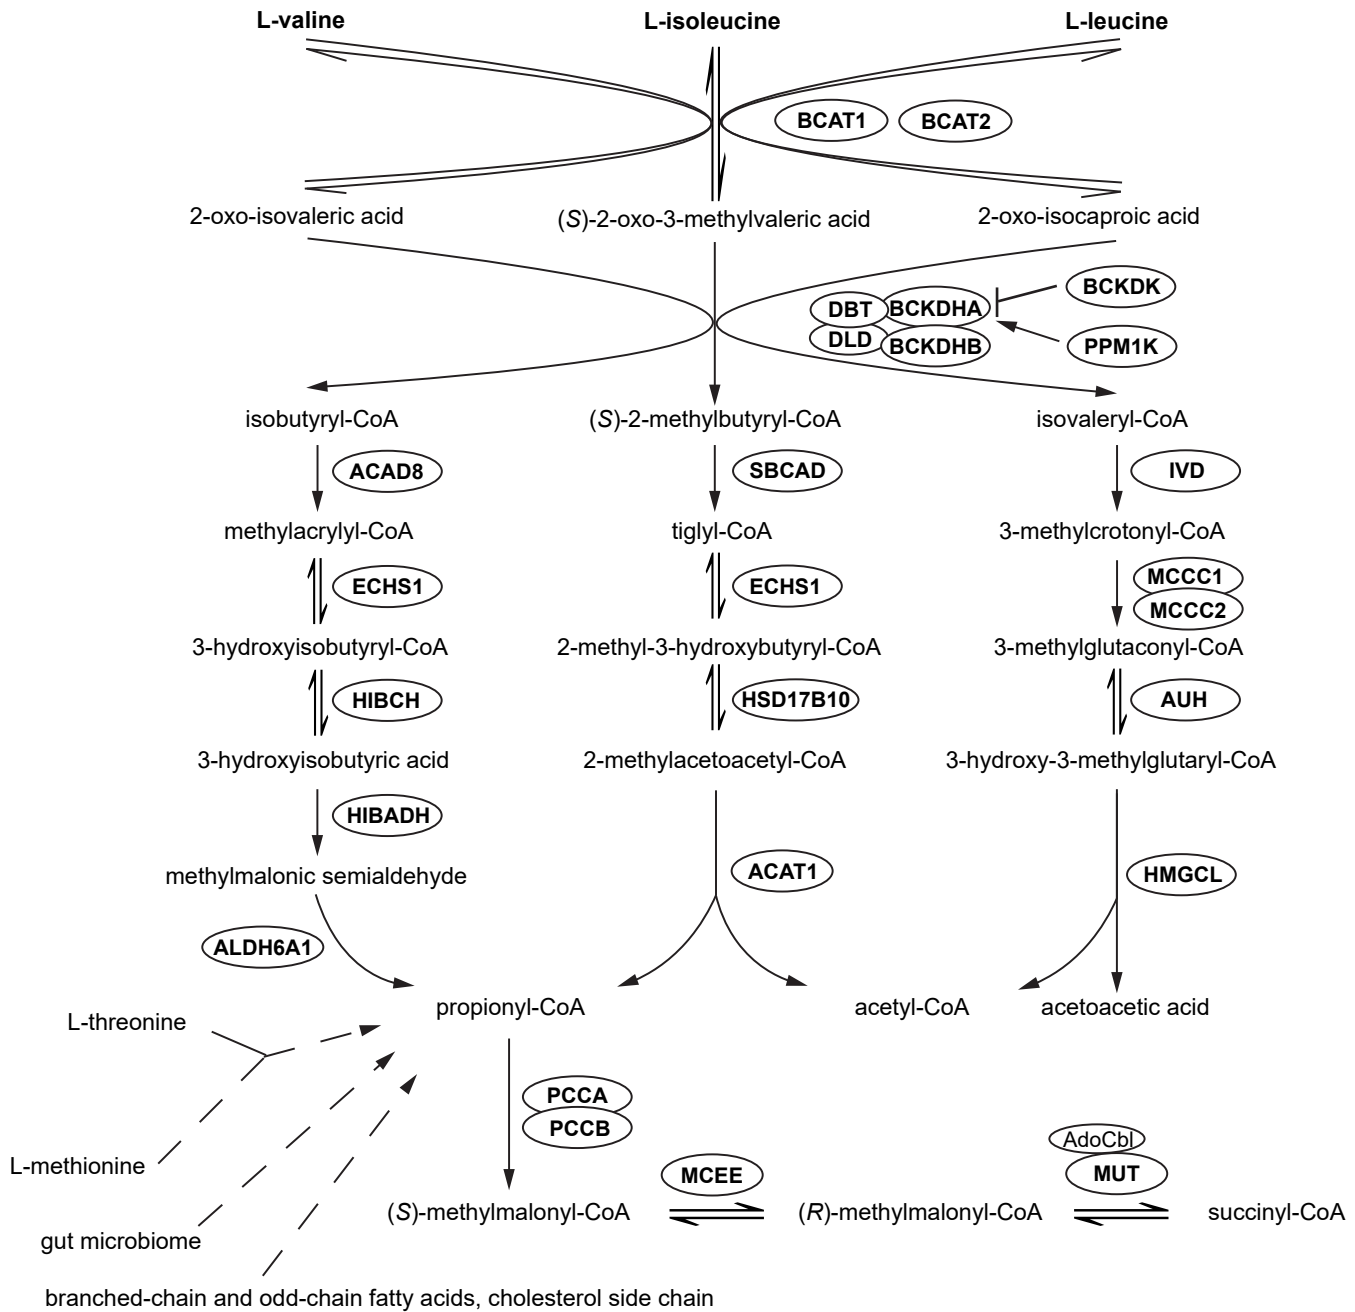



**Figure S2**

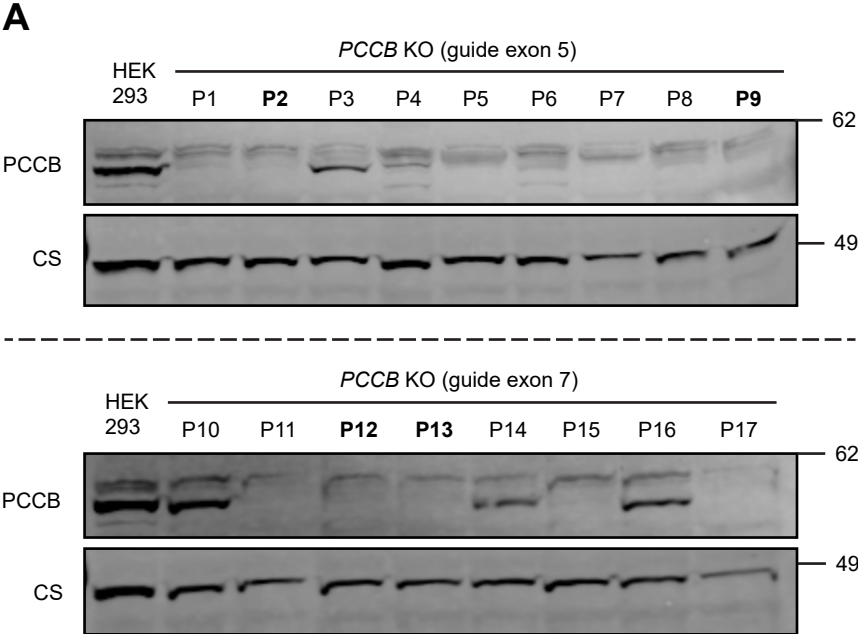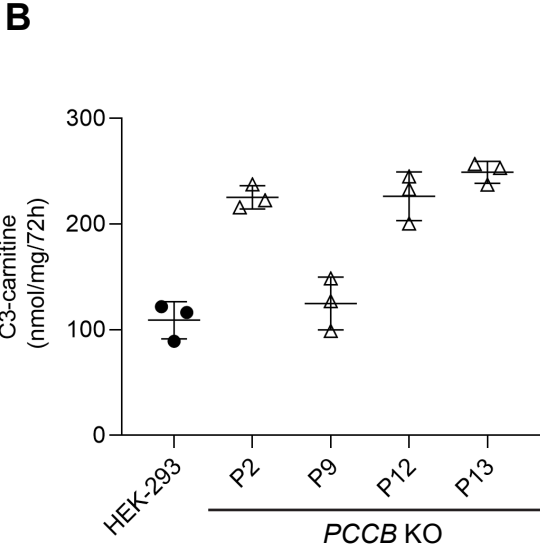

**Figure S3**

**A**

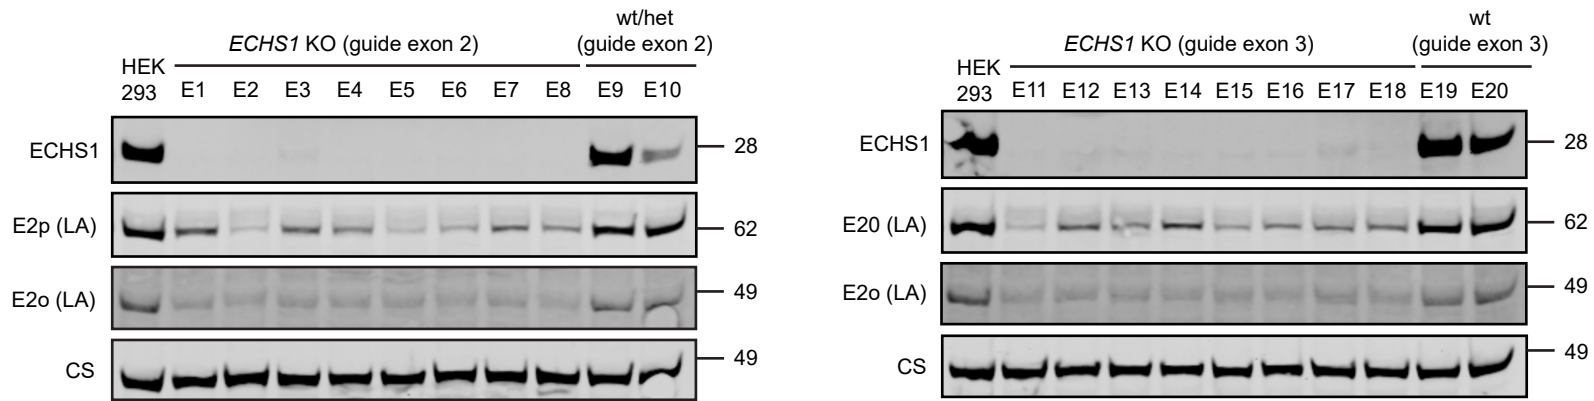

**B**

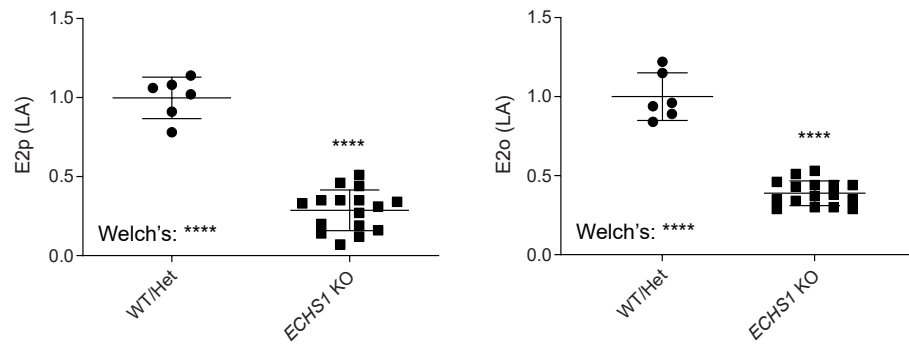

**C**

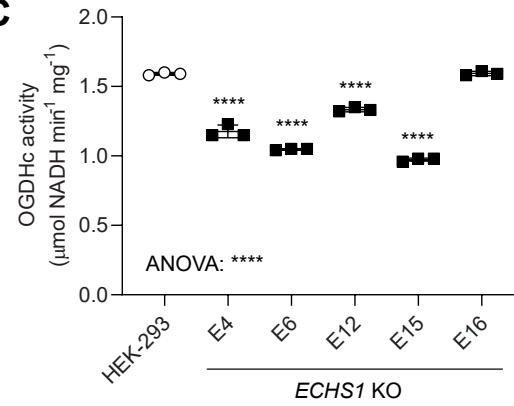

**Figure S4****A****C0-carnitine**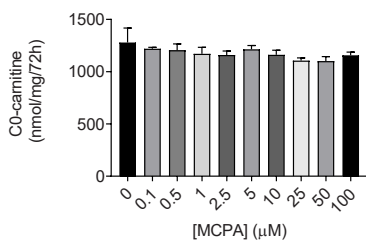**C2-carnitine**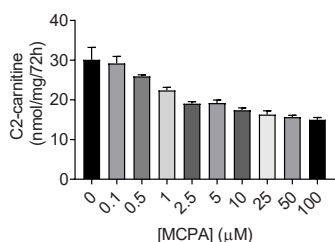**C3-carnitine**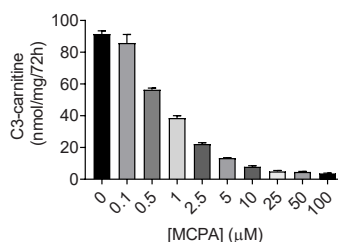**C4-carnitine**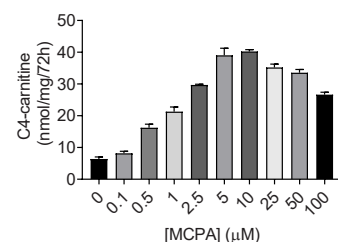**C5-carnitine**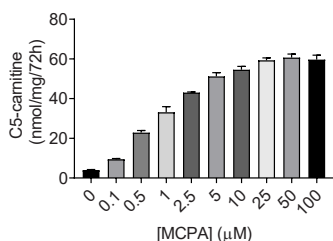**C5DC-carnitine**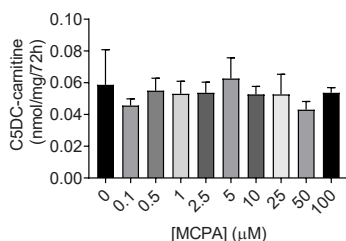**C6-carnitine**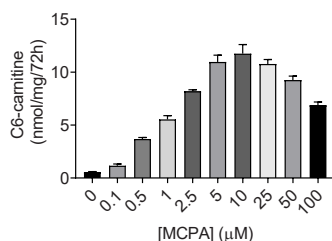**C8-carnitine**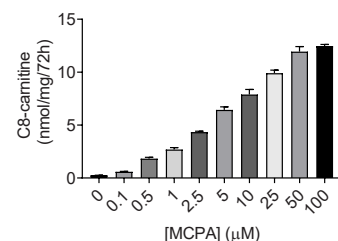**C10-carnitine**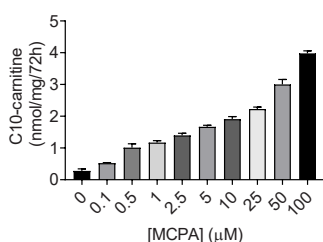**C10:1-carnitine**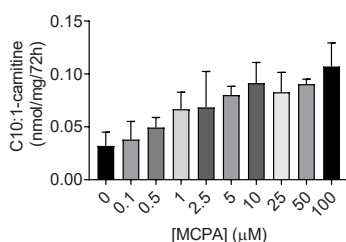**C12-carnitine**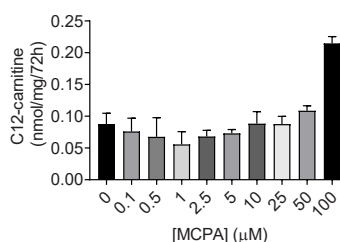**C12:1-carnitine**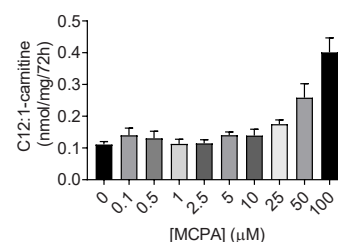**C14-carnitine**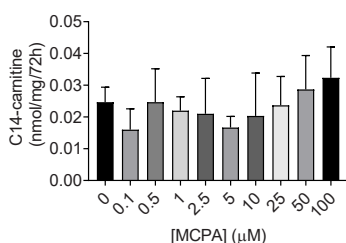**C14:1-carnitine**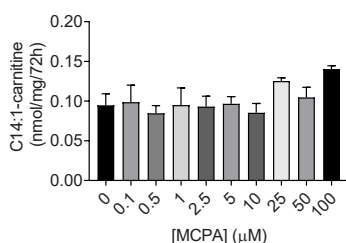**C16-carnitine**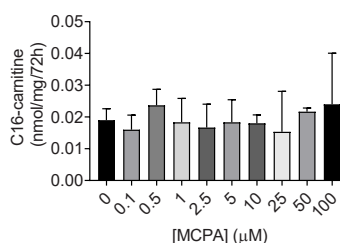**B****C4-carnitine isomers****isobutyryl-carnitine**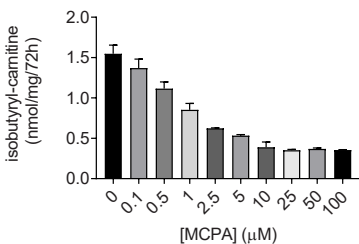**butyryl-carnitine**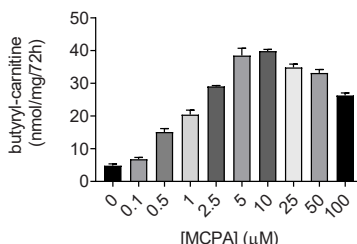**C5-carnitine isomers****(R)-2-methylbutyryl-carnitine**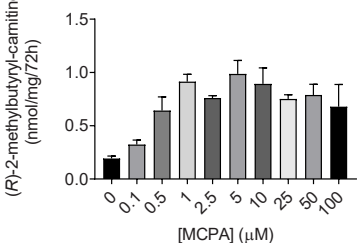**(S)-2-methylbutyryl-carnitine**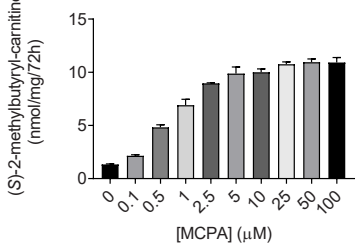**isovaleryl-carnitine**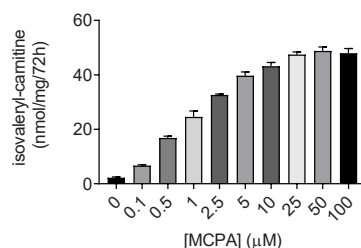**valeryl-carnitine**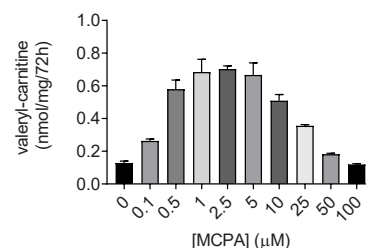

**Figure S5**

**A**

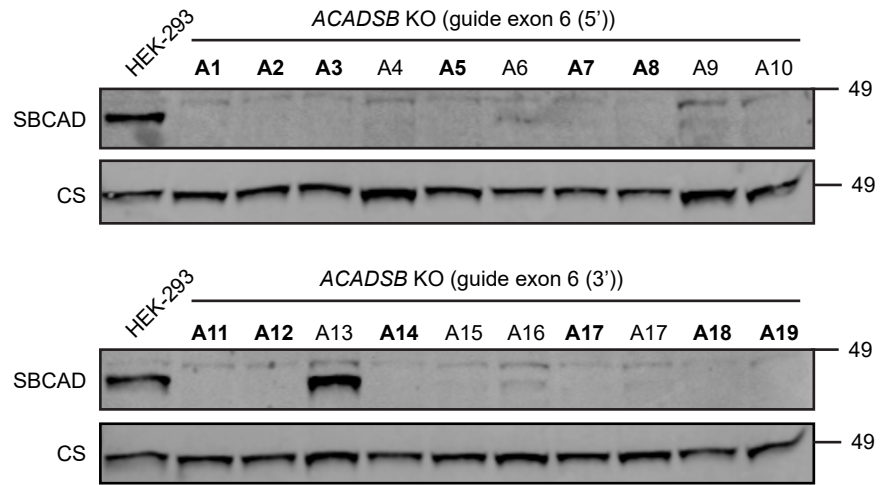

**B**

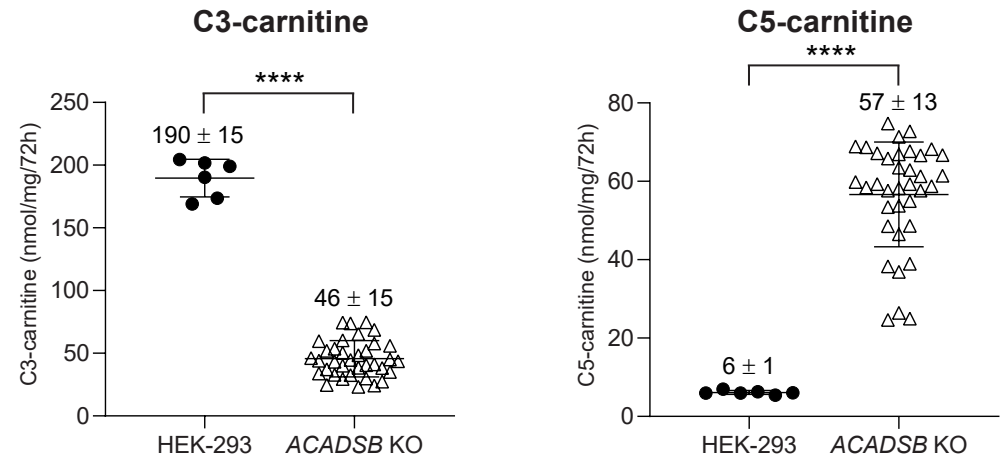

**Figure S5****C**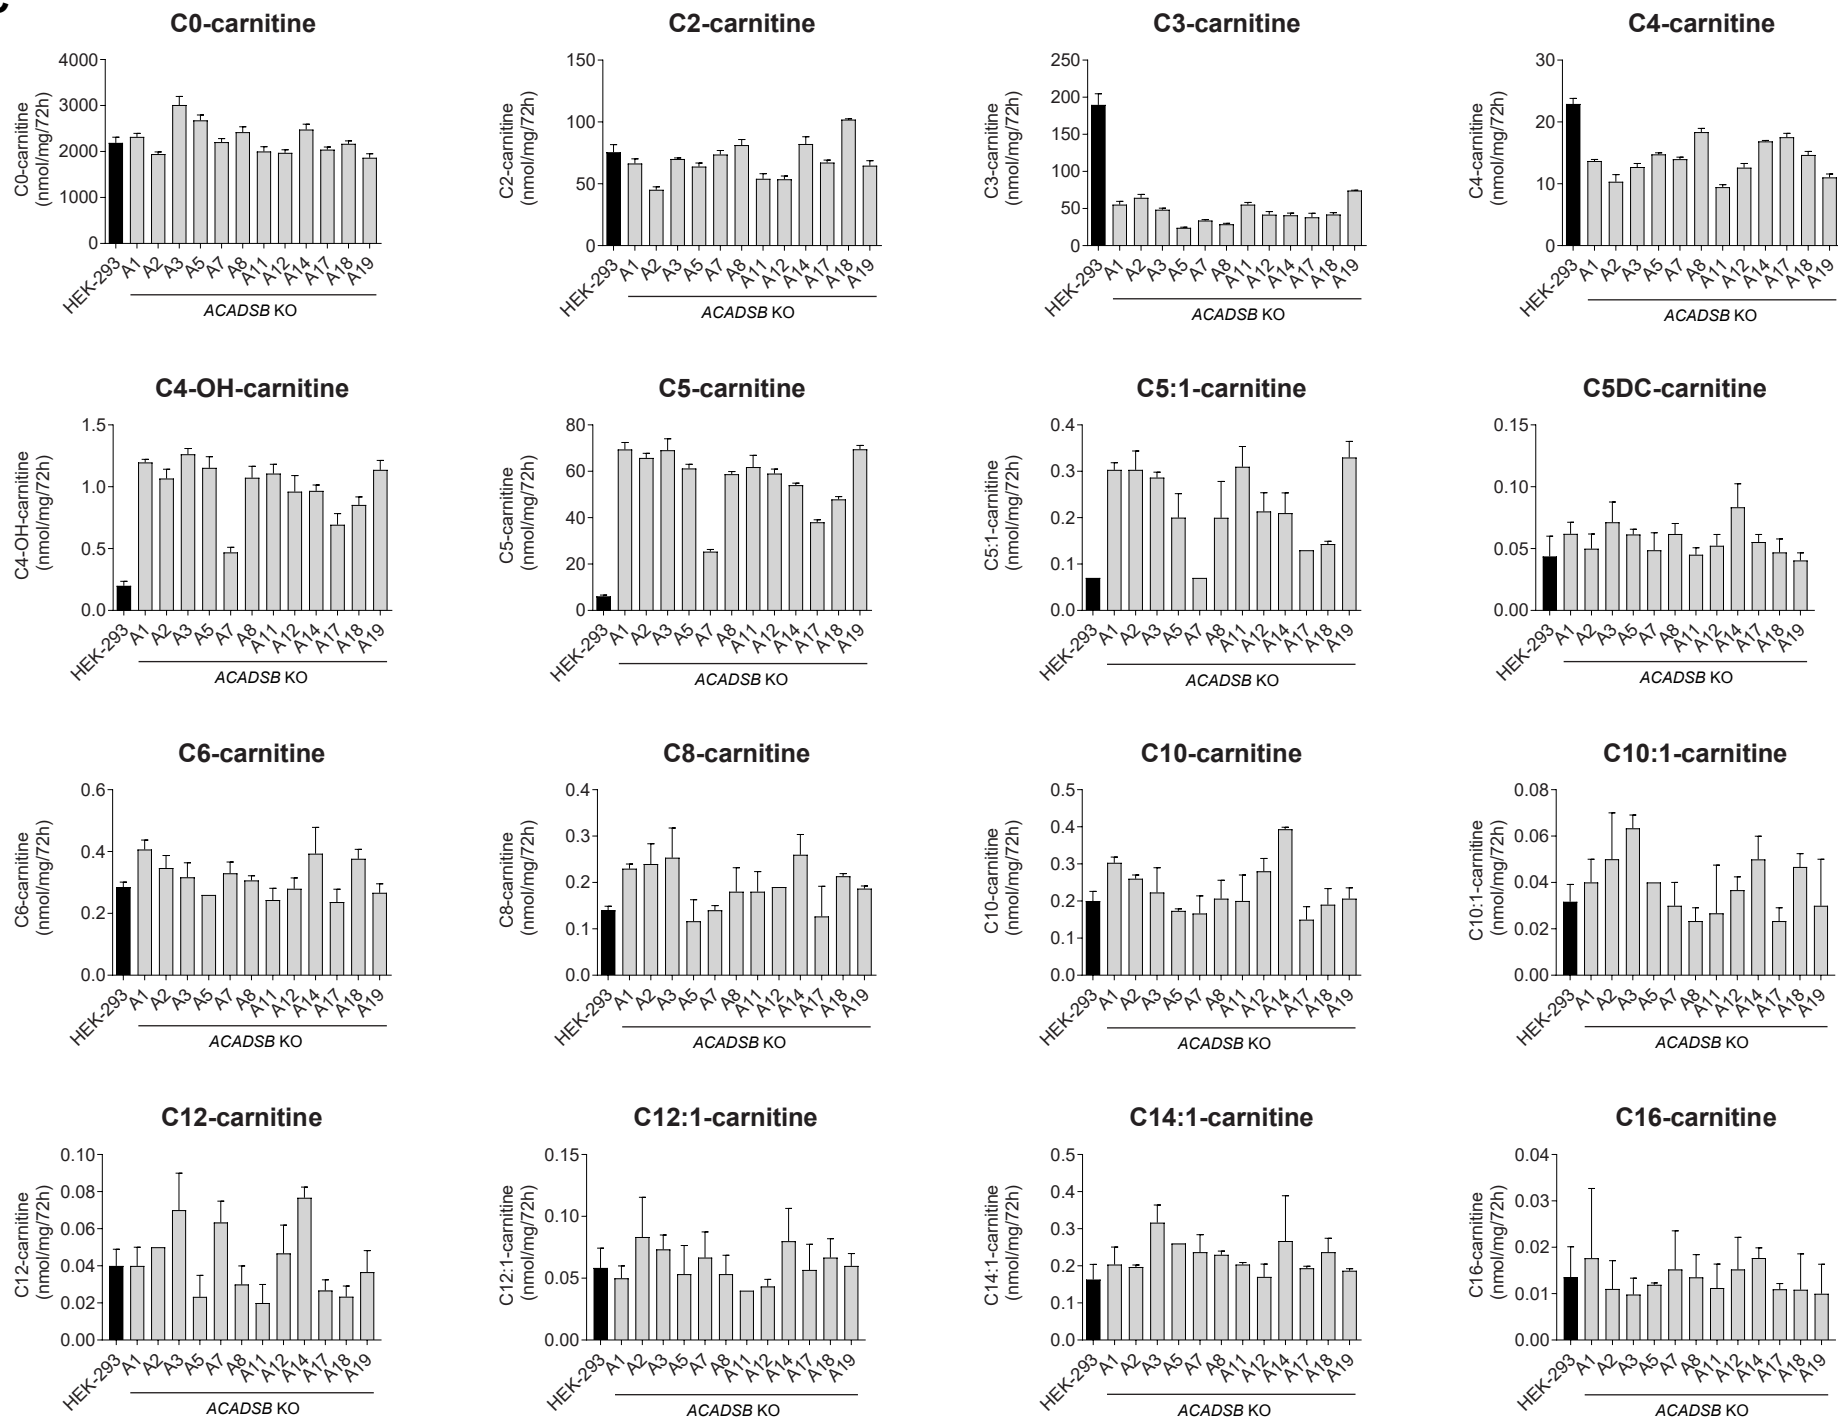

**Figure S6**

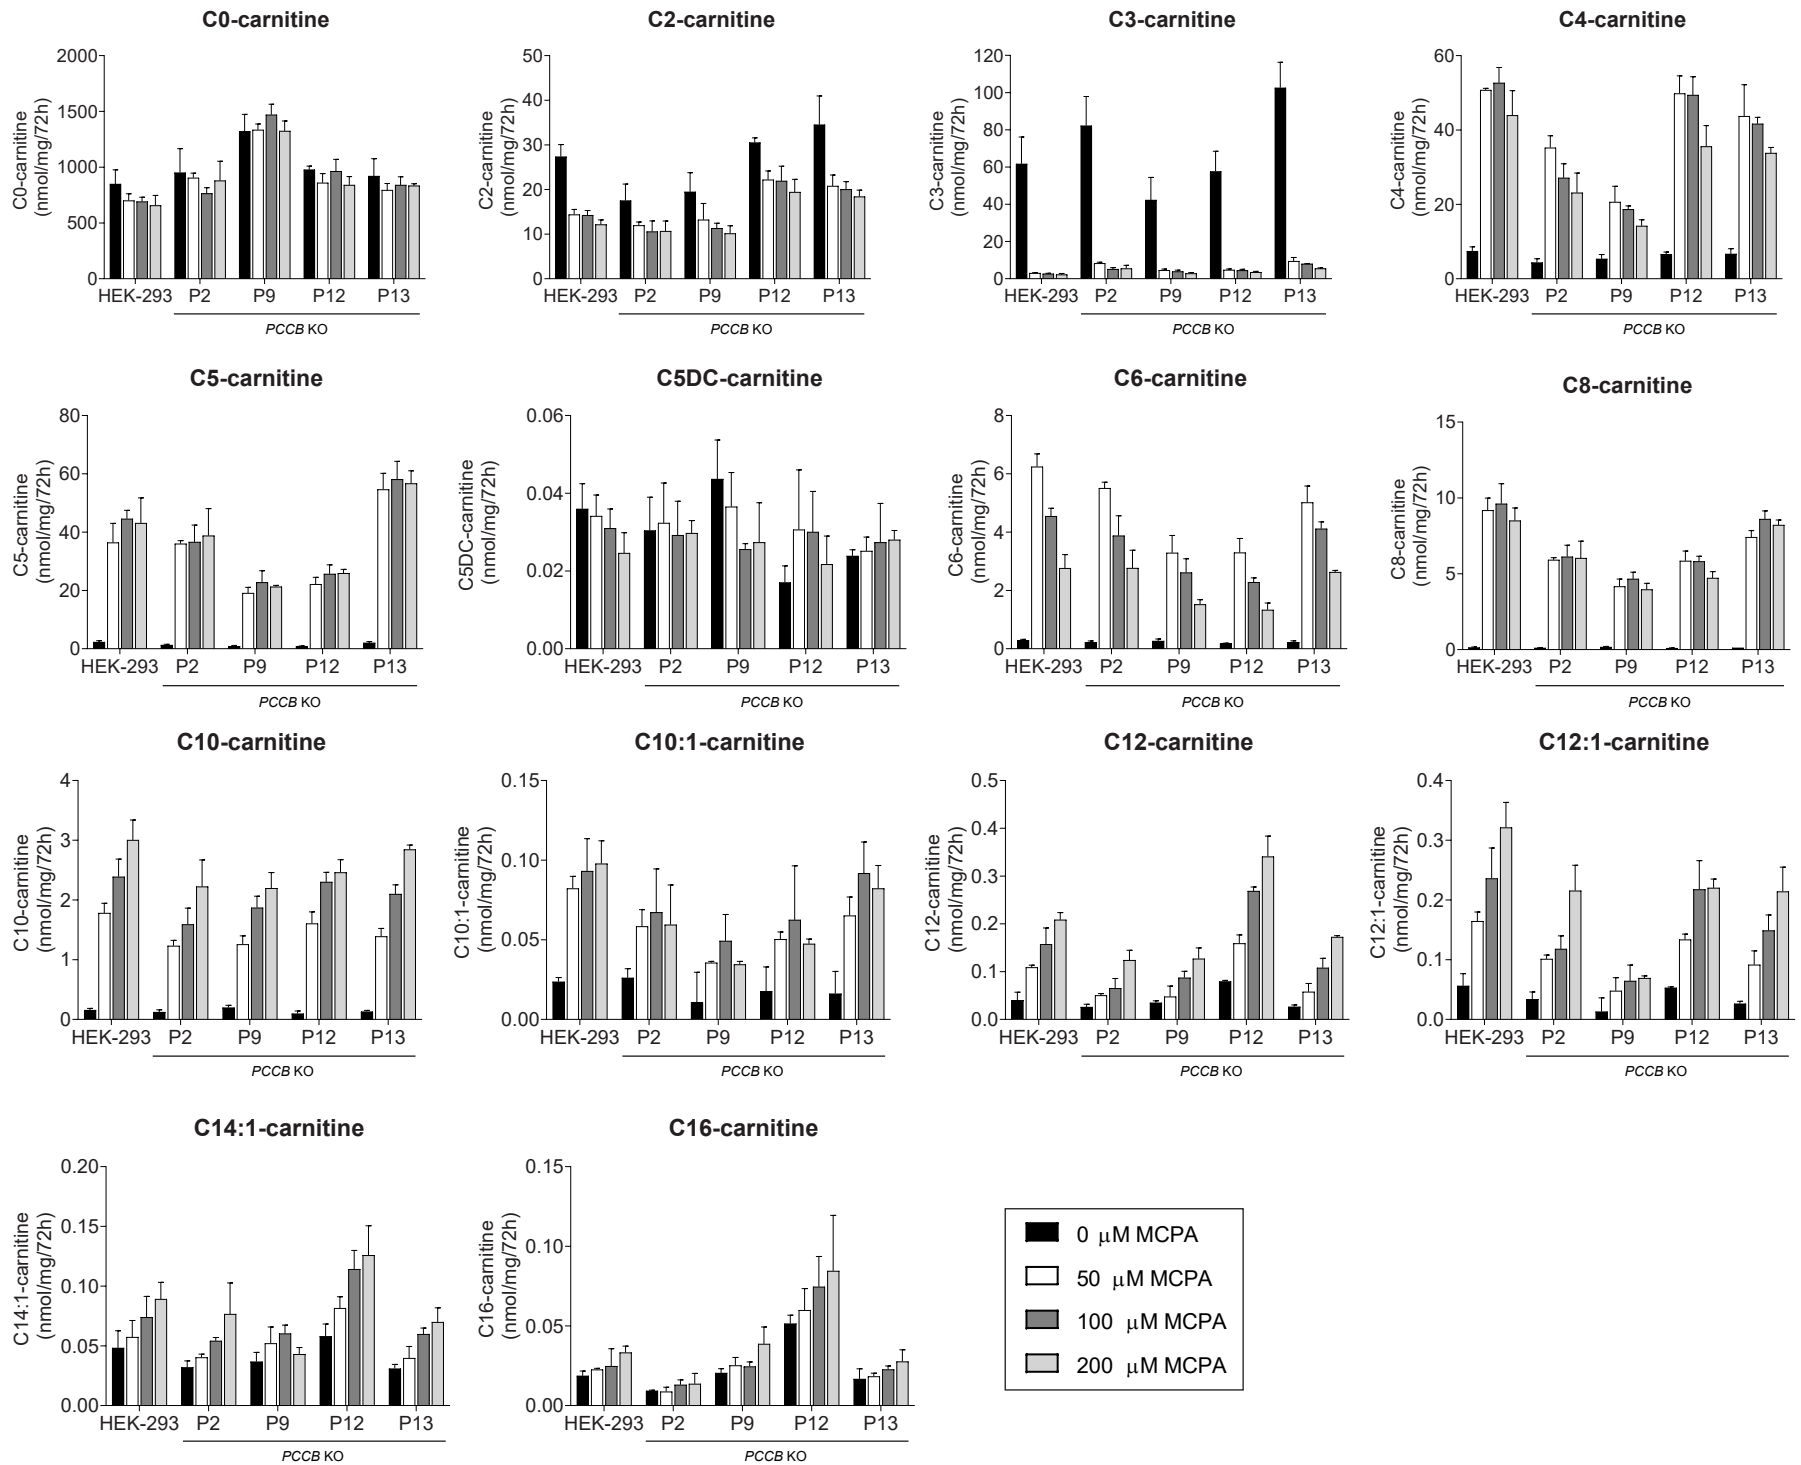

Figure S7

A

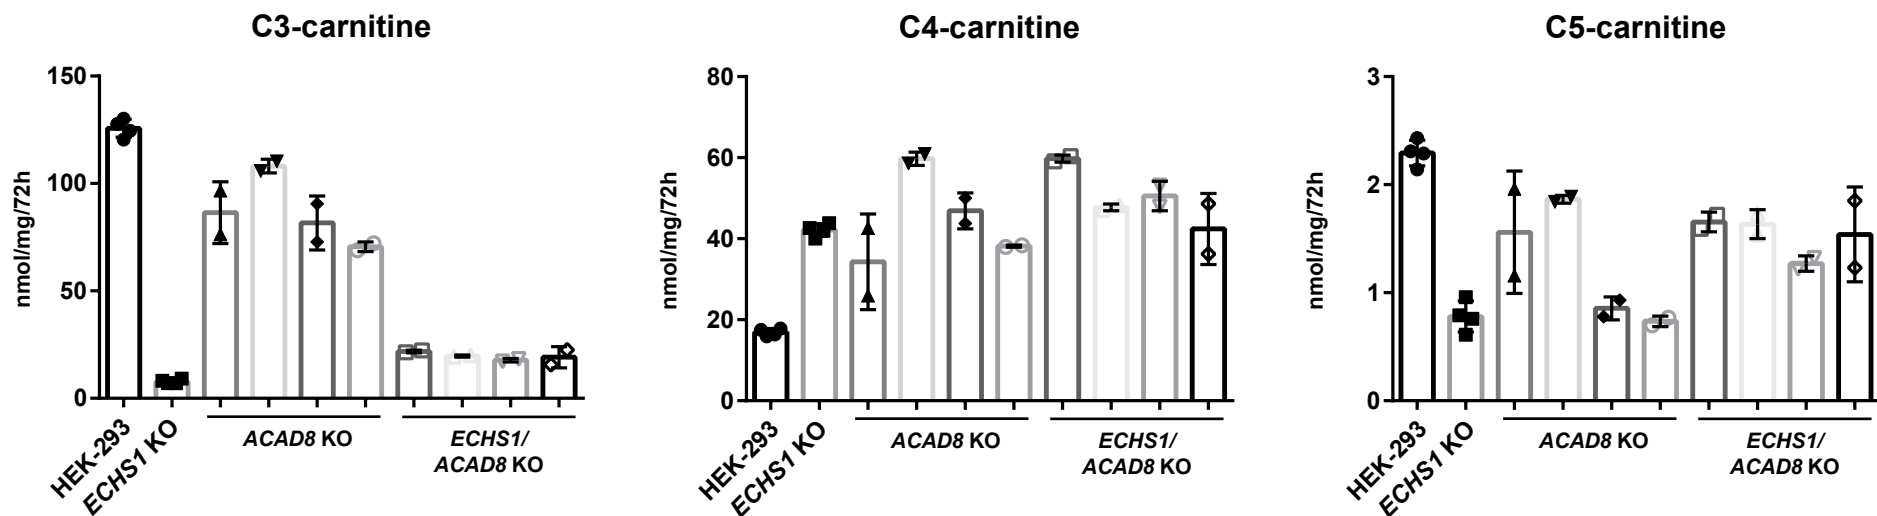

B

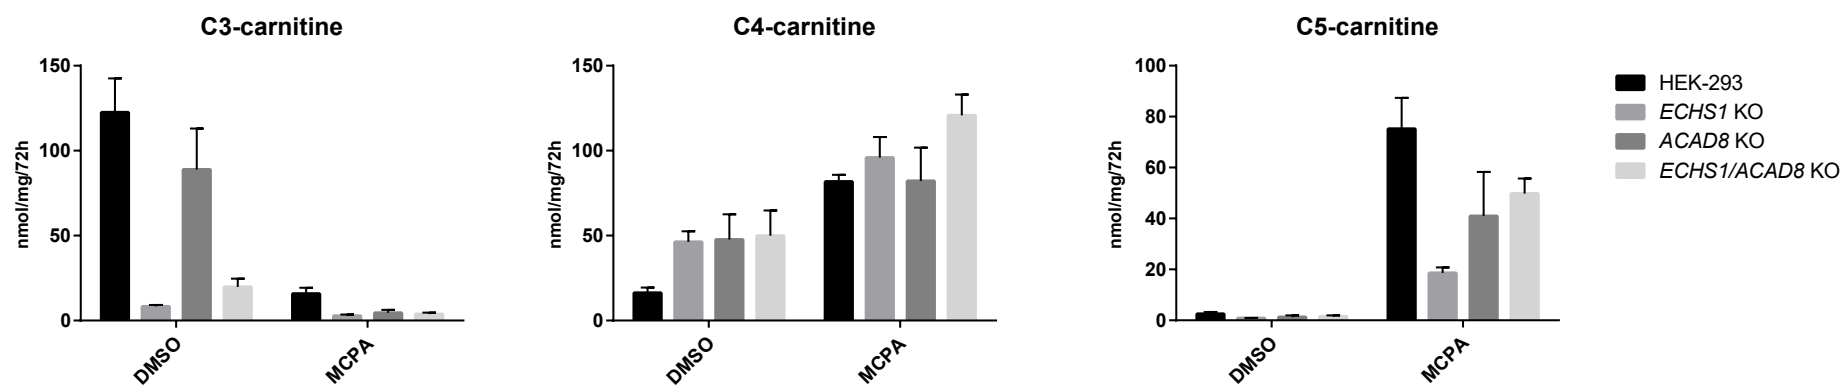

**Figure S8**

**A**

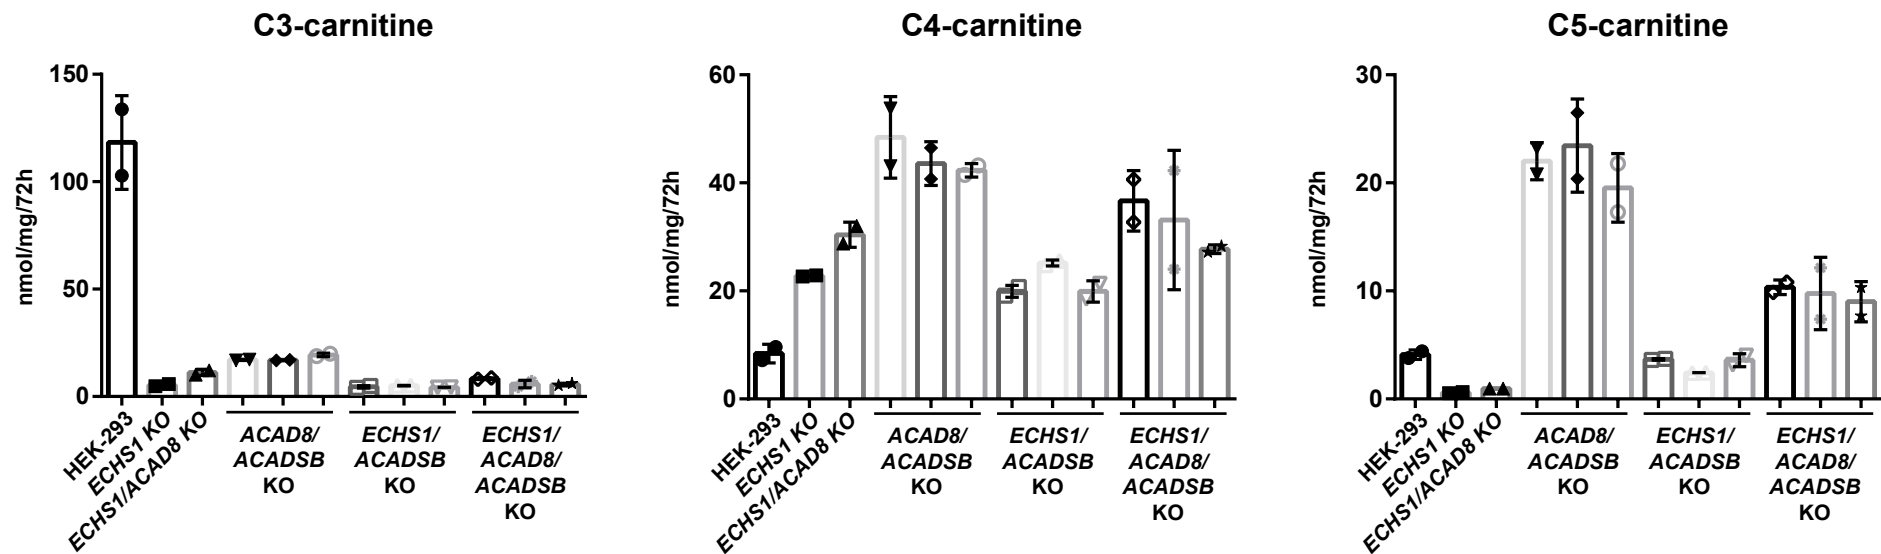

**B**

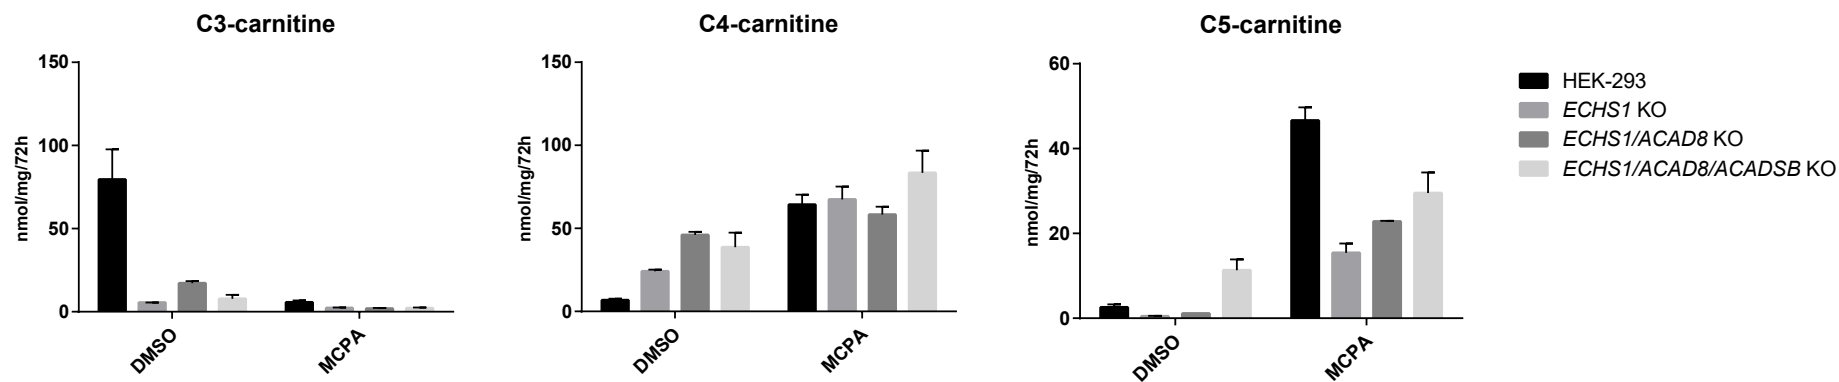



Figure S9

A

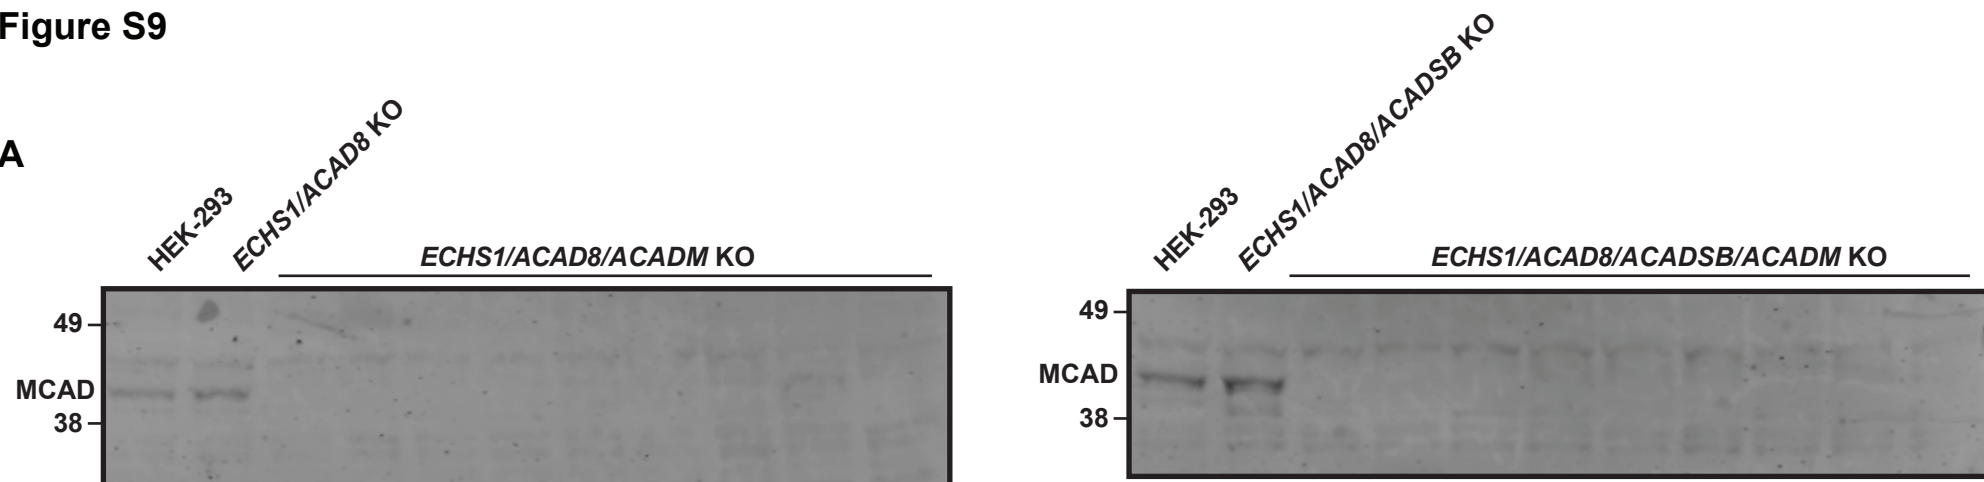

B

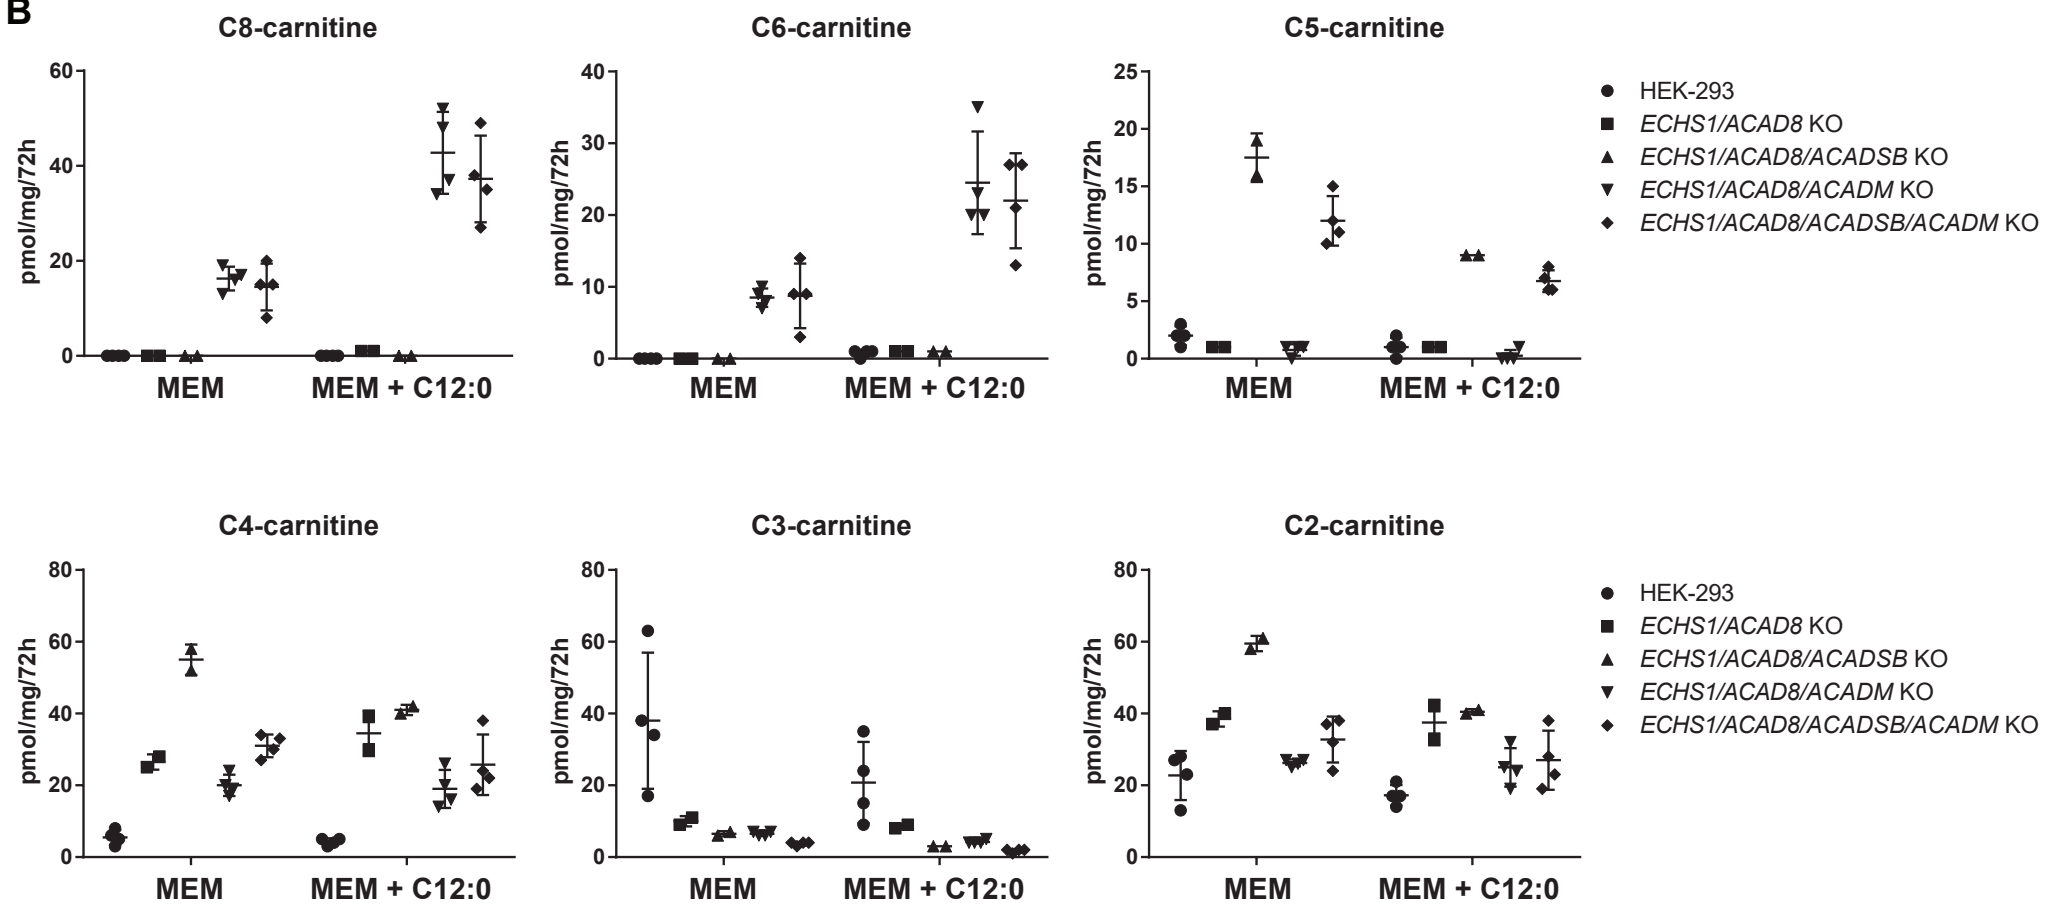

Supplement: Supplementary file [file media-1.pdf]
